# Supplementary material for: Thermal Stability and Flammability Studies of MXene–Organic Hybrid Polystyrene Nanocomposites
Source: MDPI journal article supplement (doi:10.3390/polym14061213), 2022-03-17
Supplement: s1 [file s1]

# Thermal Stability and Flammability Studies of MXene–Organic Hybrid Polystyrene Nanocomposites

Zhuoran Zhang <sup>1</sup>, Huaixuan Cao <sup>1,2</sup>, Yufeng Quan <sup>1</sup>, Rong Ma <sup>1</sup>, Emily B. Pentzer <sup>2,3</sup>, Micah J. Green <sup>1,2</sup>, and Qingsheng Wang <sup>1,\*</sup>

<sup>1</sup> Artie McFerrin Department of Chemical Engineering, Texas A&M University, College Station, TX 77843, USA; zhuoranzhang@tamu.edu (Z.Z.); chx744933979@tamu.edu (H.C.); yquan@tamu.edu (Y.Q.); marong1863@tamu.edu (R.M.); micah.green@tamu.edu (M.J.G.)

<sup>2</sup> Department of Materials Science and Engineering, Texas A&M University, College Station, TX 77843, USA; emilypentzer@chem.tamu.edu (E.B.P.)

<sup>3</sup> Department of Chemistry, Texas A&M University, College Station, TX 77843, USA

\* Correspondence: qwang@tamu.edu

## 1. Characterizations of MAX (Ti<sub>3</sub>AlC<sub>2</sub>), MXene (Ti<sub>3</sub>C<sub>2</sub>), and O-Ti<sub>3</sub>C<sub>2</sub>

**Figure S1** shows the atomic force microscopy (AFM) image of Ti<sub>3</sub>C<sub>2</sub> nanosheets, with a thickness of ~1.6 nm, indicating single-layer nanosheets.

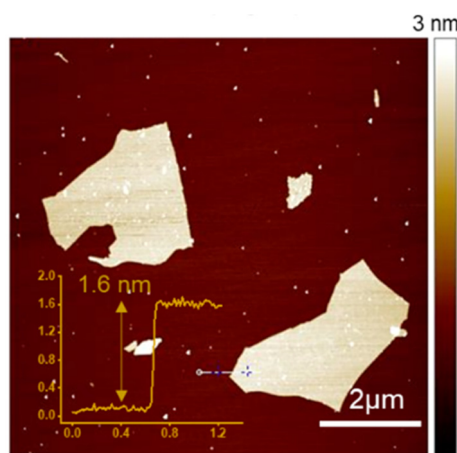

**Figure S1.** AFM image of Ti<sub>3</sub>C<sub>2</sub> dropcast dispersion (inset shows the thickness of the Ti<sub>3</sub>C<sub>2</sub> nanosheet along the line).

Fourier transform infrared spectroscopy (FTIR) patterns of Ti<sub>3</sub>C<sub>2</sub>T<sub>x</sub> MXene are shown in **Figure S2**. It can be observed that the additional Ti–OH (3369 cm<sup>−1</sup>), C–F (1142 cm<sup>−1</sup>), and Ti–O (623 cm<sup>−1</sup>) groups are introduced into Ti<sub>3</sub>C<sub>2</sub>T<sub>x</sub>.

**Citation:** Zhang, Z.; Cao, H.; Quan, Y.; Ma, R.; Pentzer, E.B.; Green, M.J.; Wang, Q. Thermal Stability and Flammability Studies of MXene–Organic Hybrid Polystyrene Nanocomposites. *Polymers* **2022**, *14*, 1213. <https://doi.org/10.3390/polym14061213>

Academic Editor: Francisco Javier Espinach Orús and Quim Tarrés Farrés

Received: 25 February 2022

Accepted: 14 March 2022

Published: 17 March 2022

**Publisher's Note:** MDPI stays neutral with regard to jurisdictional claims in published maps and institutional affiliations.

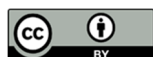

**Copyright:** © 2022 by the authors. Submitted for possible open access publication under the terms and conditions of the Creative Commons Attribution (CC BY) license (<https://creativecommons.org/licenses/by/4.0/>).

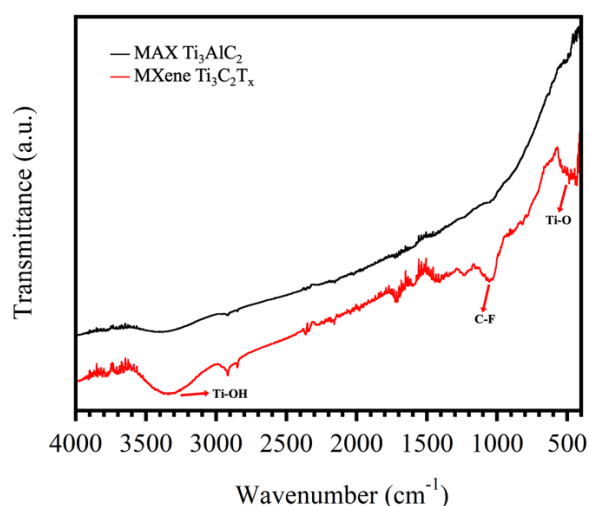

**Figure S2.** FTIR patterns of MAX  $\text{Ti}_3\text{AlC}_2$  and MXene  $\text{Ti}_3\text{C}_2\text{T}_x$

## 2. Dispersion of O- $\text{Ti}_3\text{C}_2$ in DMF

It has been reported that once the positively charged head ( $-\text{N}(\text{CH}_3)_3$ ) interacts with the electronegative oxygen atoms in the  $\text{Ti}-\text{O}-\text{Ti}$  groups on  $\text{Ti}_3\text{C}_2$  monolayer, the hydrophobicity of the resulting MXene-organic hybrids is expected to increase. We can observe (**Figure S3**) after 24 h: 1) the MXene nanosheets can form a good dispersion in DI water; 2) the dispersion is poor in DMF which could cause a poor dispersion in PS nanocomposites and therefore influence the flame retardancy; 3) the modified MXene-organic hybrids is not dispersed in DI water due to its charged head; 4) and the dispersion in DMF is homogeneous and stable, which could lead to a better dispersion in PS nanocomposite synthesis.

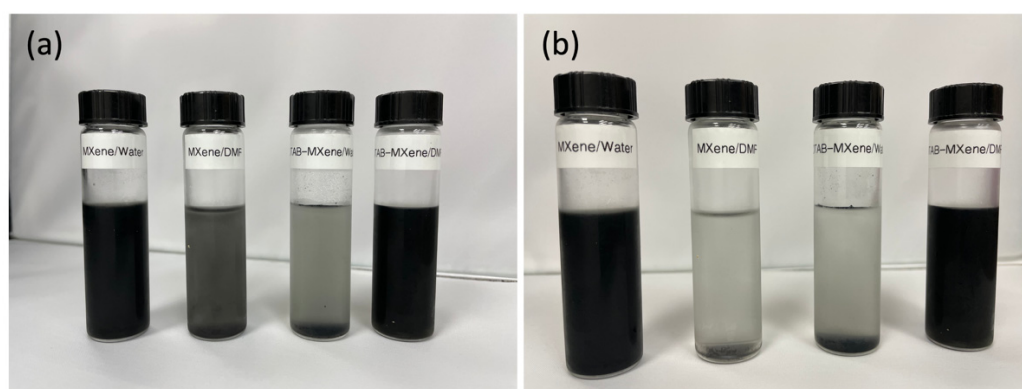

**Figure S3.** Dispersion of MXene nanosheets and MXene-organic hybrids in water and DMF (from left to right: MXene/DI water, MXene/DMF, O-MXene/DI water, O-MXene/DMF) for (a) 0 h, (b) 24 h.

## 3. O- $\text{Ti}_3\text{C}_2$ TGA Result Calculation

The thermal stability of OTAB was studied by TGA and DTG curves, and the results are shown in **Figure S4**. The initial degradation temperatures for OTAB at 5 wt% was 230 °C, and the OTAB cationic surfactant was completely degraded at around 280 °C. For the modified O- $\text{Ti}_3\text{C}_2$ , the initial degradation onset temperature at 5 wt% was also 230 °C, which indicates the major

thermal degradation is due to the grafting of cationic surfactant OTAB. As mentioned in the experimental section, 5.25 mL of organic cationic modifier OTAB/deionized water (DI) solution (1 wt%) was added to 150 mL MXene dispersion (1 mg/mL). Theoretically, 74.1 wt% of the O-Ti<sub>3</sub>C<sub>2</sub> should be thermally stable Ti<sub>3</sub>C<sub>2</sub>. Considering the mass loss due to water and surface functional groups, the final 75.6 wt% residue indicates OTAB is successfully attached to the surface of Ti<sub>3</sub>C<sub>2</sub> nanosheets.

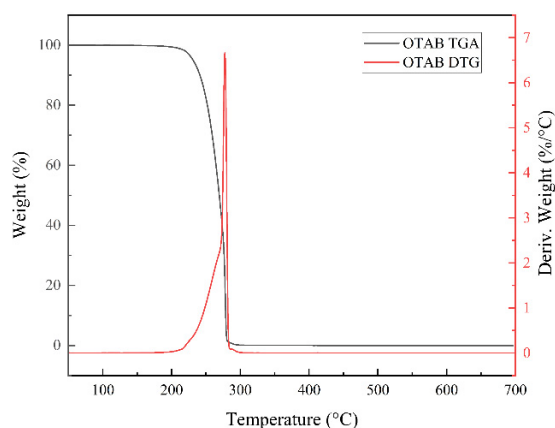

**Figure S4.** TGA and DTG curves of OTAB under nitrogen conditions

#### 4. PS/O-Ti<sub>3</sub>C<sub>2</sub> (2 wt%) EDS Result Calculation

The detailed electron distribution spectroscopy (EDS) results were shown in **Table S1** and **Figure S5**. Except for the C from the carbon bones of PS and the carbon layer of MXene, the Ti element is a characteristic signal in EDS. The theoretical weight% of the Ti element in the nanocomposite is around 1.2%. The observed Ti element in our nanocomposites (0.89%) indicates the successful synthesis of PS/O-Ti<sub>3</sub>C<sub>2</sub> nanocomposite.

**Table S1.** Electron distribution spectroscopy EDS result for weight%.

| Element | Weight% | Atomic% |
|---------|---------|---------|
| C       | 99.11   | 99.78   |
| Ti      | 0.89    | 0.22    |
| Total   | 100.00  |         |

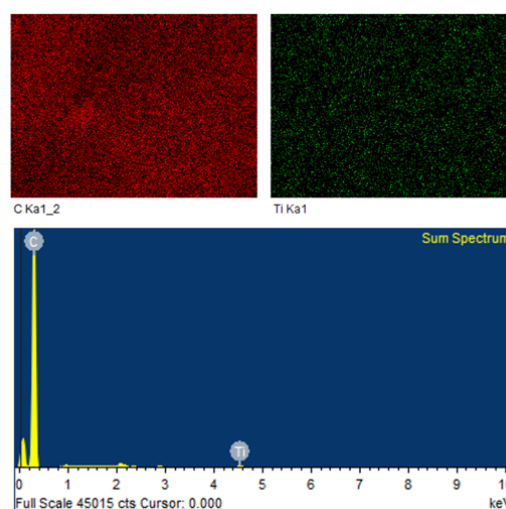

**Figure S5.** EDS element distribution and signal intensity
